# Supplementary material
Source: PubMed Central journal article supplement (PMC1894752)
Supplement: 239_2006_284_Supp.pdf [file 239_2006_284_Supp.pdf]

# The Mechanisms of Codon Reassignments in Mitochondrial Genetic Codes

Supratim Sengupta, Xiaoguang Yang, and Paul G. Higgs

## Supplementary Information

### Methods

The list of species used in our study in each of the principal eukaryotic taxa is given in Table S1. In taxa with few complete mitochondrial genomes, all the available species were included. In taxa with many complete genomes (particularly metazoa), representative species were used. Table S1 also gives information on the set of amino acids for which tRNAs are present in each genome, and the reference number of the genetic code used by each species following the NCBI genetic code numbering system. This system is summarized in Table S2 for reference.

For the plants/algae set we used concatenated protein alignments of *cox1,2,3,cob,atp6,9,nad1,3,4,4l,5*, having a total length of 3385 amino acids. The genes for *atp8*, *nad2* and *nad6* were found to be substantially more divergent than the rest, and were excluded to avoid introducing noise into the data. For the fungi, most of the *nad* genes are missing. Therefore, we used an alignment of *cox1,2,3,cob,atp6,9* with a total length of 1701 amino acids. In a few cases when a specific gene was missing in any species (e.g. *Candida albicans* does not have the *cob* gene), the entry for that gene was filled by gaps. Multiple sequence alignments were carried out using T-COFFEE (Notredame *et al.* 2000) and the alignment was edited to remove columns having more than 20% gaps. Phylogenetic analysis was performed using the MCMC program available in the PHASE package (Jow *et al.* 2003). The mtREV24 amino acid substitution matrix with a gamma distribution for site variation with four categories was used. In order to compare the Bayesian posterior probabilities from MCMC with bootstrap values, we also generated 100 bootstrap replicate data sets. Maximum likelihood pairwise distance matrices were calculated for each replicate using the same evolutionary model, and trees were constructed using the neighbour joining (NJ) method using the PHYLIP package (Felsenstein 1989). Bootstrap percentages were obtained from this set of trees.

We also carried out independent phylogenetic analysis with a combined alignment of large and small subunit rRNA genes to ascertain if the trees derived from the proteins and rRNAs are consistent with one another. The rRNA sequences were aligned initially using ClustalX (Thompson *et al.* 1997). Variable regions of the molecules were excluded from the analysis by deleting sites with more than 10% gaps in the alignment. The lengths of the alignments were 2063 and 3829 for the fungi and plants/algae. We analyzed the rRNA data sets using a method that accounts for conserved RNA structure. A consensus secondary structure was added to the alignments. The general reversible model was used for the unpaired sites, and a model specifically treating compensatory substitutions was used for the paired sites (model 7A in Savill *et al.* 2001). Parameters for both models are optimized simultaneously by the MCMC program (see Hudelot *et al.* 2003 and the documentation to the PHASE package available at <http://www.bioinf.man.ac.uk/resources/phase/>). For both models, variation of rates across sites was accounted for using 4 gamma-distributed categories.

## Phylogenetic discussion

Although there is general agreement on the definitions of the major eukaryotic taxa, the relationships between groups in the very earliest parts of the eukaryotic tree have proved difficult to resolve (Lang *et al.* 1999; Baldauf *et al.* 2000; Van der Peer *et al.* 2000; Baldauf 2003; Philippe *et al.* 2004). Our aim here was not to resolve these early branches, but to obtain trees that would allow for accurate positioning of the codon reassignments.

The grouping of fungi and metazoa, proposed by Baldauf & Palmer (1993), is supported by all the studies cited in the previous paragraph. *Amoebidium parasiticum* and *Monosiga brevicollis* are thought to be the closest unicellular relatives of the metazoa, and are therefore also included in this group. *Dictyostelium discoideum* and *Acanthamoeba castellanii* are thought to be more distant relatives of this group that diverge before the split of fungi and metazoa (Baldauf *et al.* 2000; Van der Peer *et al.* 2000; Lang *et al.* 2002). These are therefore included in this subset as outgroups.

In Figure 1 we focus on the phylogeny within the fungi and include only a few representative metazoa. The tree from the mitochondrial proteins is very well resolved. Almost all nodes have 100% posterior probability (PP), and most also have high bootstrap percentage (BP). The branching order of the species within Ascomycota agrees with Bullerwell *et al.* (2003a) and Kurtzman and Robnett (2003), and that within Chytridiomycota agrees with Bullerwell *et al.* (2003b). An exception is *A. macrogynus*. In the NJ analysis, the most common position of this species is with the Chytridiomycota, but it appears as basal to the Zygomycota/Basidiomycota/Ascomycota according the MCMC analysis in Figure 1. When the Zygomycota are excluded, *A. macrogynus* moves to the base of the Chytridiomycota in the MCMC tree. The uncertainty in the position of this species does not affect any of our conclusions regarding changes in the genetic code.

The mitochondrial rRNA tree topology for the fungi is identical to the protein tree in Figure 1, with the exception of the position of *Candida stellata*. In the rRNA tree *C. stellata* pairs with *Yarrowia* (PP = 98%, BP = 72%). In the protein tree, *C. stellata* branches after *Yarrowia* (PP = 100%), although the BP is 0% for this arrangement because in the protein NJ consensus tree, it branches before *Yarrowia*. The positioning of *C. stellata* is therefore not clear. Nevertheless, whatever its position, *C. stellata* is separate from *C. albicans* + *C. parapsilosis*, and these are all separate from *C. glabrata*. Thus, it is clear that *Candida* is paraphyletic. Kurtzman & Robnett (2003) and Diezmann *et al.* (2004) have considered the phylogeny of these groups using nuclear genes, and find that *Candida*, *Kluyveromyces*, *Saccharomyces* and *Pichia* are all paraphyletic.

The second data set contains Rhodophyta (red algae), Chlorophyta (green algae) and Streptophyta (plants). *Malawimonas jakobiformis* and *Reclinomonas americana* are added as outgroups. These are found to be related to the plants and algae by Lang *et al.* (2002) and Forget *et al.* (2002). The protein sequence phylogeny for this group (Figure 2) is again quite well resolved. The Rhodophyta, Chlorophyta and Streptophyta are all monophyletic, with Rhodophyta basal to the other two, which is consistent with results of Lang *et al.* (2002). However, the grouping of *Reclinomonas* with the rhodophytes, instead of being an outgroup to rhodophytes + chlorophytes + streptophytes is most likely an artefact. The positioning of *Nephroselmis* and *Prototheca* is also somewhat questionable because these species appear in different positions in the NJ tree and hence they have low BP in Figure 2. The rRNA phylogeny is the same as Figure 2 with the following exceptions. In this case *Reclinomonas* and *Malawimonas* are indeed outgroups as expected, and there is strong support for rhodophytes + chlorophytes + streptophytes (100% PP). However, in the rRNA tree, *Nephroselmis* shifts to being basal to Streptophyta instead of being basal to the other Chlorophyta. Turmel *et al.* (1999)

find that the position of *Nephroselmis* shifts according to the method and sequences used, but conclude that it is the basal species within Chlorophyta. Figure 2 is also equivalent to the tree obtained by Pombert *et al.* (2004). We therefore conclude that, for the study in the remainder of this paper, the protein tree in Figure 2 is the best estimate of the phylogeny of this group, with the interpretation that *Reclinomonas* should be an outgroup. The position of *Reclinomonas*, and the uncertainty regarding *Nephroselmis* do not affect the conclusions regarding codon reassignments that we make later in the paper.

The third data set contains species that are clearly not associated with either the fungi/metazoa or plants/algae. Basal branches in this tree have been left as multifurcating. This set may not be monophyletic with respect to the groups in Figures 1 and 2, *i.e.* it is possible that the fungi/metazoa or plants/algae may lie within the tree of Figure 3. If this is the case, it does not affect the conclusions regarding the genetic code. In order to position some of the genetic code changes in this set it is necessary to include species for which complete mitochondrial genomes are not available. We therefore cannot show a tree derived only from mitochondrial genes. Stramenopiles and alveolates are two groups that are thought to be monophyletic according to Wolters (1991) and Saunders *et al.* (1995). The combination of these two groups is sometimes called Chromalveolata, and is supported by Van der Peer *et al.* (2000), Baldauf *et al.* (2000), and Philippe *et al.* (2004). For the arrangement of the species within the Stramenopiles, we used the results of a much larger scale study with the nuclear small subunit rRNA gene (Van der Peer *et al.* 1996). For the species in which mitochondrial genomes were available, we carried out protein and rRNA phylogenies as with the previous two sets. This was not very informative due to the small number of species available. However, one useful point that emerged was that *N. gruberi* appeared as sister group to the Alveolates with 100% PP from both the protein and rRNA analysis. We have therefore placed it in that position on Figure 3. We are not confident of this result due to the poor species sampling and the possibility of long-branch artefacts involving the Alveolates. Repositioning this species might lead to an increase in the inferred number of times that tRNA import has evolved, but it would not affect the positioning of the codon reassignments. The Haptophyceae are a separate group from Alveolates and Stramenopiles. For the species in this group we followed Hayashi-Ishimaru *et al.* (1997). The complete genome of *E. huxleyi* has become available since that study, and has been added in Figure 3. We confirmed its relationship to *I. galbana* using the *cox1* protein sequence only.

Figure 4 shows the metazoa. This is a well studied group. We have followed Mallatt & Winchell (2002) and Halanych (2004) for the relationship between the animal phyla.

## References

- Baldauf SL, Palmer JD (1993) Animals and fungi are each other's closest relatives: congruent evidence from multiple proteins. *Proc. Natl. Acad. Sci. USA* 90:11558–11562.
- Baldauf SL, Roger AJ, Wenk-Siefert I, Dolittle WF (2000) A kingdom-level phylogeny of eukaryotes based on combined protein data. *Science*. 290: 972-977.
- Baldauf SL (2003) The deep roots of eukaryotes. *Science* 300: 1703-1706.
- Bullerwell CE, Leigh J, Forget L, Lang BF (2003a). A comparison of three fission yeast mitochondrial genomes. *Nucl. Acids Res.* 31: 759-768.
- Bullerwell CE, Forget L, Lang BF (2003b) Evolution of monoblepharidalean fungi based on complete mitochondrial genome sequences. *Nucl. Acids Res.* 31: 1614-1623.
- Diezmann S, Cox CJ, Schonian G, Vilgalys RJ, Mitchell TG (2004) Phylogeny and evolution of medical species of *Candida* and related taxa: a multigenic analysis. *J Clin Microbiol.* 42:5624-5635.
- Felsenstein J (1989) PHYLIP – Phylogeny Inference Package (Version 3.2) *Cladistics.* 5:164-166. See also Felsenstein, J (2005) PHYLIP (Version 3.6) Distributed by author. Department of Genome Sciences, University of Washington, Seattle.
- Forget L, Ustinova J, Wang Z, Huss VAR, Lang BF (2002) *Hyaloraphidium curvatum*: a linear mitochondrial genome, tRNA editing, and an evolutionary link to the lower fungi. *Mol. Biol. Evol.* 19: 310-319.
- Halanych KM (2004) The new view of animal phylogeny. *Annu. Rev. Ecol. Evol. Syst.* 35: 229-256.
- Hayashi-Ishimaru Y, Ohama T, Kawatsu Y, Nakamura K, Osawa S (1996) UAG is a sense codon in several chlorophycean mitochondria. *Curr. Genet.* 30:29-33.
- Hudelot C, Gowri-Shankar V, Jow H, Rataray M, Higgs PG (2003) Bayesian phylogenetics using an RNA-based phylogenetic methods: Applications to mammalian mitochondrial RNA sequences. *Mol. Phyl. Evol.* 28: 241- 252.
- Jow H, Hudelot C, Rattray M, Higgs PG (2002) Bayesian phylogenetics using an RNA substitution model applied to early mammalian evolution. *Mol. Biol. Evol.* 19:1591-1601.
- Kurtzman CP, Robnett CJ (2003) Phylogenetic relationships among yeasts of the *Saccharomyces* complex determined from multigene sequence analyses. *FEMS Yeast Res.* 3: 417-432.
- Lang BF, Seif E, Gray MW, O'Kelly CJ, Burger G (1999) A comparative genomics approach to the evolution of eukaryotes and their mitochondria. *J Eukaryot Microbiol.* 46:320-326.
- Lang BF, O'Kelly C, Nerad T, Gray MW, Burger G (2002) The closest unicellular relatives of animals. *Curr. Biol.* 12:1773-1778.

- Mallatt J, Winchell CJ (2002) Testing the new animal phylogeny: First use of combined large subunit and small subunit rRNA gene sequences to classify protostomes. *Mol. Biol. Evol.* 19: 289-301.
- Notredame C, Higgins D, Heringa J (2000) T-Coffee: A novel method for multiple sequence alignments. *J. Mol. Biol.* 302:205-217.
- Philippe H, Snell EA, Baptiste E, Lopez P, Holland PWH, Casane D (2004) Phylogenomics of Eukaryotes: Impact of missing data on large alignments. *Mol. Biol. Evol.* 21: 1740-1752.
- Pombert JF, Otis C, Lemieux C, Turmel M The Complete Mitochondrial DNA Sequence of the Green Alga *Pseudendoclonium akinetum* (Ulvophyceae) Highlights Distinctive Evolutionary Trends in the Chlorophyta and Suggests a Sister-Group Relationship Between the Ulvophyceae and Chlorophyceae. *Mol. Biol. Evol.* 21:922–935 (2004).
- Saunders GW, Potter D, Paskind MP, Andersen RA (1995) Cladistic analyses of combined traditional and molecular data sets reveal an algal lineage. *Proc. Natl. Acad. Sci. USA* 92:244–248.
- Savill NJ, Hoyle DC, Higgs PG (2001) RNA sequence evolution with secondary structure constraints: Comparison of substitution rate models using maximum likelihood methods. *Genetics* 157, 399-411.
- Thompson JD, Gibson TJ, Plewniak F, Jeanmougin F, Higgins DG (1997) The CLUSTAL X windows interface: flexible strategies for multiple sequence alignment aided by quality analysis tools. *Nucl. Acids Res.* 25: 4876-4882.
- Turmel M, Lemieux C, Burger G, Lang BF, Otis C, Plante I, Gray MW (1999) The complete mitochondrial DNA sequences of *Nephroselmis olivacea* and *Pedinomonas minor*: two radically different evolutionary patterns within green algae. *The Plant Cell* 11: 1717-1729.
- Van der Peer Y, Van der Auwera G, De Wachter R (1996) The evolution of stramenopiles and alveolates as derived by “substitution rate calibration” of small subunit RNA. *J. Mol. Evol.* 42: 201-210.
- Van de Peer Y, Baldauf SL, Dolittle WF, Meyer A (2000) An update and comprehensive rRNA phylogeny of (crown) eukaryotes based on rate-calibrated evolutionary distances. *J. Mol. Evol.* 51:565-576.
- Wolters J (1991) The troublesome parasites - Molecular and morphological evidence that Apicomplexa belong to the dinoflagellate ciliate clade. *BioSystems* 25:75-83 (1991).

Table S1 - List of species with complete mitochondrial genomes used in this study

| Species                               | Taxon            | Code No. | Amino acids for which tRNAs are present            |
|---------------------------------------|------------------|----------|----------------------------------------------------|
| <b>Figure 1</b>                       |                  |          |                                                    |
| <i>Acanthamoeba castellanii</i>       | Acanthamoebidae  | 4        | A, D, E, F, H, I, K, L(CUN), L(UUR), M, P, Q, W, Y |
| <i>Dictyostelium discoideum</i>       | Mycetozoa        | 1        | All but D, G, R(CGN), S(UCN), S(AGY), T, V         |
| <i>Amoebidium parasiticum</i>         | Ichthyosporia    | 4        | Full set                                           |
| <i>Monosiga brevicollis</i>           | Choanoflagellida | 4        | Full set                                           |
| <i>Rhizophydium</i> sp. 136           | Chytridiomycota  | 16       | K, L(UAG), M, P, Q, W, Y                           |
| <i>Spizellomyces punctatus</i>        | Chytridiomycota  | 16       | D, K, L(UAG), M, P, Q, W, Y                        |
| <i>Hyaloraphidium curvatum</i>        | Chytridiomycota  | 1*       | D, E, M, P, Q, W, Y                                |
| <i>Monoblepharella</i> sp. JEL15      | Chytridiomycota  | 1        | D, E, G, K, M, P, Q, W, Y                          |
| <i>Harpochytrium</i> sp. JEL105       | Chytridiomycota  | 1*       | D, E, K, M, P, Q, W, Y                             |
| <i>Harpochytrium</i> sp. JEL94        | Chytridiomycota  | 1*       | D, E, K, M, P, Q, W, Y                             |
| <i>Allomyces macrogynus</i>           | Chytridiomycota  | 1*       | Full set                                           |
| <i>Mortierella verticillata</i>       | Zygomycota       | 1*       | Full set                                           |
| <i>Rhizopus oryzae</i>                | Zygomycota       | 1        | Full set                                           |
| <i>Crinipellis perniciosus</i>        | Basidiomycota    | 4        | Full set                                           |
| <i>Schizophyllum commune</i>          | Basidiomycota    | 4        | Full set                                           |
| <i>Penicillium marneffei</i>          | Ascomycota       | 4        | Full set                                           |
| <i>Podospora anserina</i>             | Ascomycota       | 4        | Full set                                           |
| <i>Hypocrea jecorina</i>              | Ascomycota       | 4        | Full set                                           |
| <i>Lecanicillium muscarium</i>        | Ascomycota       | 4        | All but A, C                                       |
| <i>Schizosaccharomyces japonicus</i>  | Ascomycota       | 4        | Full set                                           |
| <i>Schizosaccharomyces octosporus</i> | Ascomycota       | 4        | Full set                                           |
| <i>Schizosaccharomyces pombe</i>      | Ascomycota       | 4        | Full set                                           |
| <i>Yarrowia lipolytica</i>            | Ascomycota       | 4        | All but R(CGN), V                                  |
| <i>Candida stellata</i>               | Ascomycota       | 4        | Full set                                           |
| <i>Candida albicans</i>               | Ascomycota       | 4        | Full set                                           |
| <i>Candida parapsilosis</i>           | Ascomycota       | 4        | Full set                                           |
| <i>Pichia canadensis</i>              | Ascomycota       | 4        | Full set                                           |
| <i>Ashbya gossypii</i>                | Ascomycota       | 3        | All but Q, R(CGN)                                  |
| <i>Kluyveromyces lactis</i>           | Ascomycota       | 3        | All but L(CUN), R(CGN)                             |
| <i>Kluyveromyces thermotolerans</i>   | Ascomycota       | 3        | All but L(CUN)                                     |
| <i>Candida glabrata</i>               | Ascomycota       | 3        | All but L(CUN), R(CGN)                             |
| <i>Saccharomyces cerevisiae</i>       | Ascomycota       | 3        | All but L(CUN)                                     |
| <i>Saccharomyces castellii</i>        | Ascomycota       | 3        | All but L(CUN), R(CGN)                             |
| <i>Saccharomyces servazzii</i>        | Ascomycota       | 3        | All but L(CUN), R(CGN)                             |
| <b>Figure 2</b>                       |                  |          |                                                    |
| <i>Malwimonas jakobiformis</i>        | Malawimonadidae  | 1        | Full set                                           |
| <i>Reclinomonas americana</i>         | Jakobidae        | 1        | All but T                                          |
| <i>Cyanidioschyzon merolae</i>        | Rhodophyta       | 1        | All but T                                          |
| <i>Chondrus crispus</i>               | Rhodophyta       | 4        | All but S(AGY), T                                  |
| <i>Porphyra purpurea</i>              | Rhodophyta       | 4        | All but T                                          |
| <i>Mesostigma viride</i>              | Streptophyta     | 1        | All but T                                          |
| <i>Chaetosphaeridium globosum</i>     | Streptophyta     | 1        | Full set                                           |
| <i>Chara vulgaris</i>                 | Streptophyta     | 1        | Full set                                           |
| <i>Marchantia polymorpha</i>          | Streptophyta     | 1        | All but I                                          |
| <i>Arabidopsis thaliana</i>           | Streptophyta     | 1        | C, D, F, G, H, K, M, N, P, Q, S(UCN), S(AGY), W, Y |
| <i>Nephroselmis olivacea</i>          | Chlorophyta      | 1        | Full set                                           |
| <i>Prototheca wickerhamii</i>         | Chlorophyta      | 1        | Full set                                           |

|                                  |             |    |                             |
|----------------------------------|-------------|----|-----------------------------|
| <i>Pseudendoclonium akinetum</i> | Chlorophyta | 1  | Full set                    |
| <i>Pedinomonas minor</i>         | Chlorophyta | 4  | C, E, F, H, L(UUR), Q, W, Y |
| <i>Scenedesmus obliquus</i>      | Chlorophyta | 22 | All but T                   |
| <i>Chlamydomonas eugametos</i>   | Chlorophyta | 1  | M, Q, W                     |
| <i>Chlamydomonas reinhardtii</i> | Chlorophyta | 1  | M, Q, W                     |

**Figure 3**

|                                  |               |    |                               |
|----------------------------------|---------------|----|-------------------------------|
| <i>Rhodomonas salina</i>         | Cryptophyta   | 1  | Full set                      |
| <i>Emiliana huxleyi</i>          | Haptophyceae  | 4  | Full set                      |
| <i>Naegleria gruberi</i>         | Heterolobosea | 1  | All but A, C, G, R(CGN), T, V |
| <i>Plasmodium falciparum</i>     | Alveolata     | 1* | None                          |
| <i>Plasmodium reichenowi</i>     | Alveolata     | 1* | None                          |
| <i>Paramecium aurelia</i>        | Alveolata     | 4  | F, M, W, Y                    |
| <i>Tetrahymena pyriformis</i>    | Alveolata     | 4  | F, H, L(UUR), M, Q, W, Y      |
| <i>Tetrahymena thermophila</i>   | Alveolata     | 4  | F, H, L(UUR), M, Q, W, Y      |
| <i>Cafeteria roenbergensis</i>   | Stramenopiles | 4  | All but L(CUN), R(CGN), T     |
| <i>Thraustochytrium aureum</i>   | Stramenopiles | 23 | All but R(CGN), R(AGR), T     |
| <i>Phytophthora infestans</i>    | Stramenopiles | 1  | All but T                     |
| <i>Saprolegnia ferax</i>         | Stramenopiles | 1  | All but T                     |
| <i>Chrysodidymus synuroideus</i> | Stramenopiles | 1  | All but R(CGN), T             |
| <i>Ochromonas danica</i>         | Stramenopiles | 1  | All but R(CGN), T             |
| <i>Laminaria digitata</i>        | Stramenopiles | 1  | All but R(CGN), T             |
| <i>Pylaiella littoralis</i>      | Stramenopiles | 1  | All but R(CGN), T             |

**Figure 4**

|                                  |                 |    |           |
|----------------------------------|-----------------|----|-----------|
| <i>Axinella corrugata</i>        | Porifera        | 4  | Full set  |
| <i>Geodia neptuni</i>            | Porifera        | 4  | Full set  |
| <i>Metridium senile</i>          | Cnidaria        | 4  | M, W      |
| <i>Acropora tenuis</i>           | Cnidaria        | 4  | M, W      |
| <i>Limulus polyphemus</i>        | Arthropoda      | 5  | Full set  |
| <i>Daphnia pulex</i>             | Arthropoda      | 5  | Full set  |
| <i>Drosophila melanogaster</i>   | Arthropoda      | 5  | Full set  |
| <i>Caenorhabditis elegans</i>    | Nematoda        | 5  | Full set  |
| <i>Trichinella spiralis</i>      | Nematoda        | 5  | Full set  |
| <i>Katharina tunicata</i>        | Mollusca        | 5  | Full set  |
| <i>Lumbricus terrestris</i>      | Annelida        | 5  | Full set  |
| <i>Terebratulina retusa</i>      | Brachiopoda     | 5  | Full set  |
| <i>Fasciola hepatica</i>         | Platyhelminthes | 9  | Full set  |
| <i>Schistosoma mansoni</i>       | Platyhelminthes | 9  | Full set  |
| <i>Taenia crassisepe</i>         | Platyhelminthes | 9  | Full set  |
| <i>Paracentrotus lividus</i>     | Echinodermata   | 9  | Full set  |
| <i>Asterina pectinifera</i>      | Echinodermata   | 9  | Full set  |
| <i>Balanoglossus carnosus</i>    | Hemichordata    | 9  | Full set  |
| <i>Saccoglossus kowalewskii</i>  | Hemichordata    | 9a | Full set  |
| <i>Halocynthia roretzi</i>       | Urochordata     | 13 | Full set  |
| <i>Cionia intestinalis</i>       | Urochordata     | 13 | Full set  |
| <i>Branchiostoma lanceolatum</i> | Cephalochordata | 5  | Full set  |
| <i>Branchiostoma floridae</i>    | Cephalochordata | 5  | Full set  |
| <i>Epigonichthys maldivensis</i> | Cephalochordata | 5  | Full set  |
| <i>Myxine glutinosa</i>          | Craniata        | 2  | Full set  |
| <i>Homo sapiens</i>              | Vertebrata      | 2  | Full set  |
| <i>Didelphis virginiana</i>      | Vertebrata      | 2  | All but K |

Table S2 - Summary of Genetic Code Numbering system (following NCBI)

| Code No. | Differences from Canonical Code                                                                  |
|----------|--------------------------------------------------------------------------------------------------|
| 1        | Canonical Code. (Species marked 1* use the canonical code but are erroneously labelled in NCBI.) |
| 4        | UGA = Trp.                                                                                       |
| 5        | UGA = Trp; AUA = Met; AGR = Ser.                                                                 |
| 2        | UGA = Trp; AUA = Met; AGR = Stop.                                                                |
| 11       | UGA = Trp; AUA = Met; AGR = Gly.                                                                 |
| 21       | UGA = Trp; AUA = Met; AGR = Ser; AAA = Asn.                                                      |
| 3        | UGA = Trp; AUA = Met or unassigned; CGN = rare or unassigned; CUN = Thr.                         |
| 16       | UAG = Leu.                                                                                       |
| 22       | UAG = Leu; UCA = Stop.                                                                           |
| 23       | UUA = Stop.                                                                                      |
| 9        | UGA = Trp; AGR = Ser; AAA = Asn or unassigned                                                    |
| 9a       | UGA = Trp; AGR = Ser. (This is similar to 9 but does not have a number in the NCBI system)       |

Table S3: Annotation of tRNA's with CAU anticodon in the Fungi group together with their position on the mitochondrial genome. *Podospora anserina* has two identical tRNA-Met(CAU) elongator genes labelled as 1a and 1b.

| Species                               | Met-Elongator (1)                    | Met-Initiator (2) | Ile(CAU) (3) |
|---------------------------------------|--------------------------------------|-------------------|--------------|
| <i>Crinipellis pernicioso</i>         | 44802-44874                          | 14445-14516       | 62938-63011  |
| <i>Schizophyllum commune</i>          | 16251-16324                          | 18809-18881       | 23325-23398  |
| <i>Schizosaccharomyces japonicus</i>  | 42182-42255                          | 63581-63652       | 48100-48171  |
| <i>Schizosaccharomyces octosporus</i> | 27317-27391                          | 40910-40983       |              |
| <i>Schizosaccharomyces pombe</i>      | 4591-4665                            | 14081-14153       | 17542-17613  |
| <i>Candida stellata</i>               | 18882-18954                          | 22272-22343       | 22191-22262  |
| <i>Pichia canadensis</i>              | 21635-21709                          | 19011-19083       | 19088-19158  |
| <i>Kluyveromyces lactis</i>           | 6768-6840                            | 14545-14616       |              |
| <i>Kluyveromyces thermotolerans</i>   | 21284-21356                          | 7352-7424         |              |
| <i>Ashbya gossypii</i>                | 5758-5828                            | 18723-18794       |              |
| <i>Candida glabrata</i>               | 13-86                                | 6889-6959         |              |
| <i>Saccharomyces cerevisiae</i>       | 72630-72705                          | 85035-85112       |              |
| <i>Saccharomyces castellii</i>        | 3292-3364                            | 8530-8603         |              |
| <i>Saccharomyces servazzii</i>        | 10527-10600                          | 15211-15284       |              |
| <i>Hypocrea jecorina</i>              | 16538-16609                          | 14475-14545       | 14691-14763  |
| <i>Lecanicillium muscarium</i>        | 5774-5845                            | 4898-4968         | 5116-5188    |
| <i>Penicillium marneffeii</i>         | 23057-23127                          | 22140-22210       | 22214-22286  |
| <i>Podospora anserina</i>             | (1a) 11266-11336<br>(1b) 26071-26141 | 9600-9670         | 9437-9509    |
| <i>Allomyces macrogynus</i>           | 42129-42203                          | 47535-47605       | 44168-44241  |
| <i>Candida albicans</i>               |                                      | 33486-33557       | 26935-27005  |
| <i>Candida parapsilosis</i>           |                                      | 21711-21780       | 21792-21862  |
| <i>Yarrowia lipolytica</i>            |                                      | 3272-3343         | 3374-3445    |
